# Supplementary material for: RNAi Screen Identifies Novel Regulators of RNP Granules in the Caenorhabditis elegans Germ Line
Source: PubMed Central journal article supplement (PMC4978917; doi:10.1534/g3.116.031559), 2016-06-09
Supplement: supp_g3.116.031559_FigureS1.pdf [file supp_g3.116.031559_FigureS1.pdf]

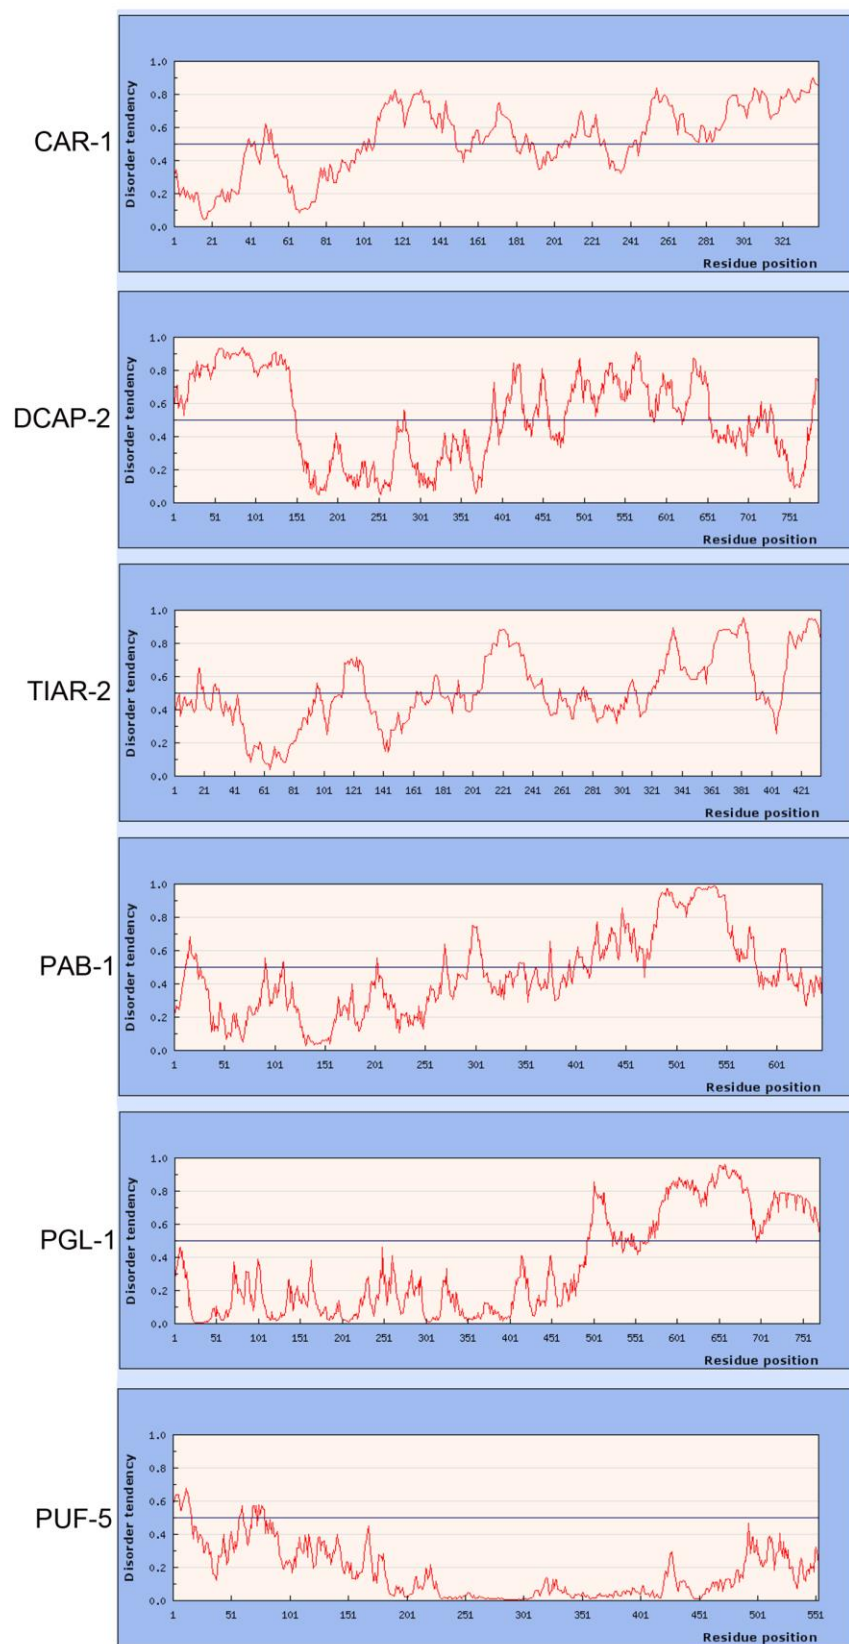

Figure S1. The majority of RNP granule protein components have IDRs. IDRs were identified using IUPRED (Dosztanyi et al. 2005). The disorder tendency was  $>0.5$  for at least one long sequence in CAR-1, DCAP-2, TIAR-2, PAB-1, and PGL-1, but not in PUF-5.
